# Supplementary material
Source: publisher figshare collection journal article supplement (https://aacr.figshare.com/articles/dataset/_/22433292)

Supplementary Figure 3

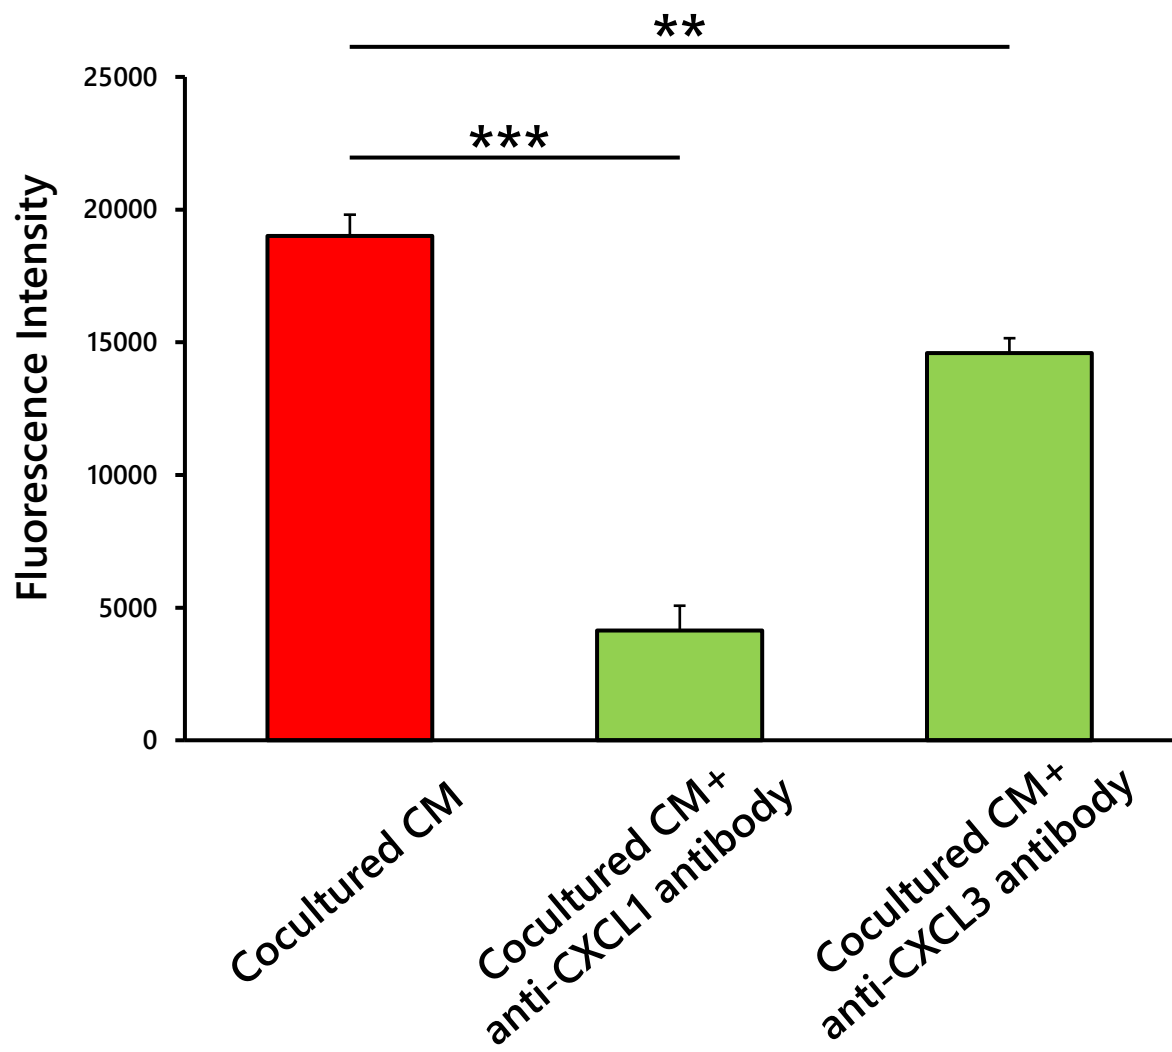

Supplement: Supplementary file 1 [file 39879729]
